# Supplementary material
Source: publisher site journal article supplement (http://www.spandidos-publications.com/2694/downloadSupplementary)

Figure S1. CircUSP36 is highly expressed in ox-LDL-exposed HUVECs in a dose- or time-dependent manner. (A) HUVECs were exposed to 0, 40, 60, 80 or 100  $\mu\text{g/ml}$  ox-LDL for 24 h, and the expression of circUSP36 in treated cells was detected by RT-qPCR (n=3). (B) HUVECs were exposed to 60  $\mu\text{g/ml}$  ox-LDL for 0, 6, 12, 24 or 48 h, and the expression of circUSP36 in treated cells was detected by RT-qPCR (n=3). \* $P < 0.05$  vs. respective control. HUVECs, human umbilical vascular endothelial cells; ox-LDL, oxidized low-density lipoprotein.

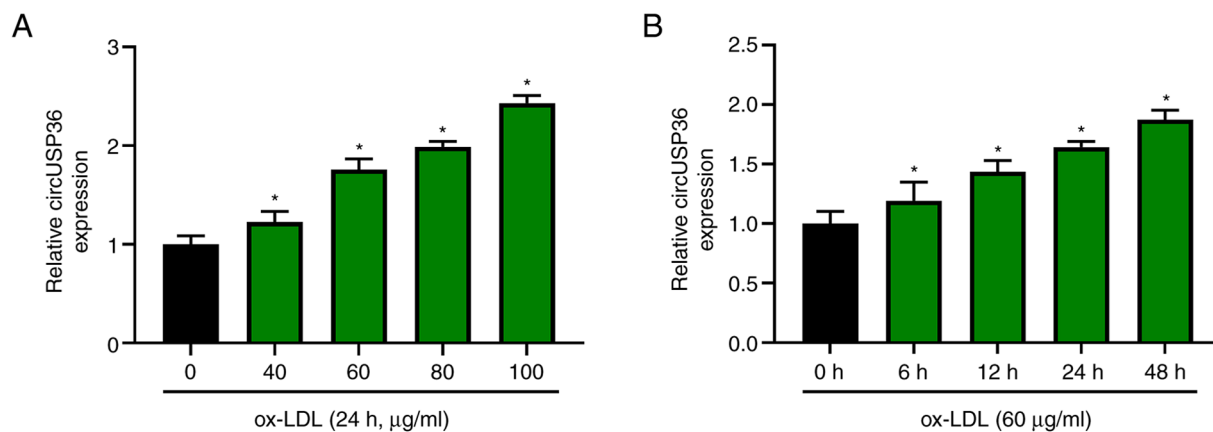

Supplement: Supplementary file 1 [file downloadSupplementary]
